# Supplementary material for: Influence of Al doping on the structure and electrochemical performance of the Co-free LiNi0.8Mn0.2O2 cathode material
Source: Royal Society of Chemistry journal article supplement (doi:10.1039/d3dt01352a), 2023-01-01
Supplement: d3dt01352a1.pdf [file d3dt01352a1.pdf]

## Supporting Information

### **Influences of Al-doping on the structure and electrochemical performance of Co-free $\text{LiNi}_{0.8}\text{Mn}_{0.2}\text{O}_2$ cathode material**

Rongzheng Tian, Shan Yin, Hongzhou Zhang,\* Dawei Song, Yue Ma, and Lianqi Zhang\*

Key Laboratory of Display Materials and Photoelectric Devices (MOE), School of Materials Science and Engineering, Tianjin University of Technology, 391 Binshui Road, Tianjin 300384, China.

Corresponding author E-mail: zhanghongzhou@mail.nankai.edu.cn;  
tianjinzhanglq@163.com.

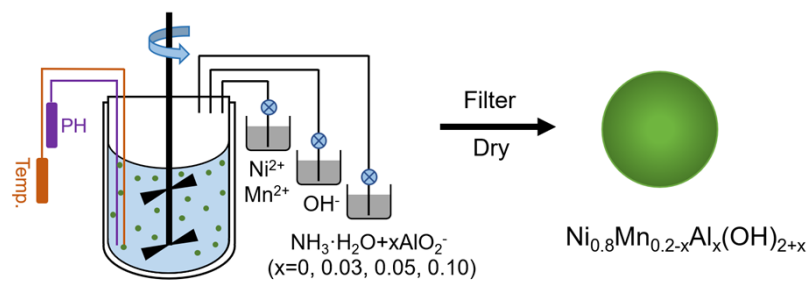

**Fig. S1** Schematic diagram of  $\text{Ni}_{0.8}\text{Mn}_{0.2-x}\text{Al}_x(\text{OH})_{2+x}$  precursor preparation.

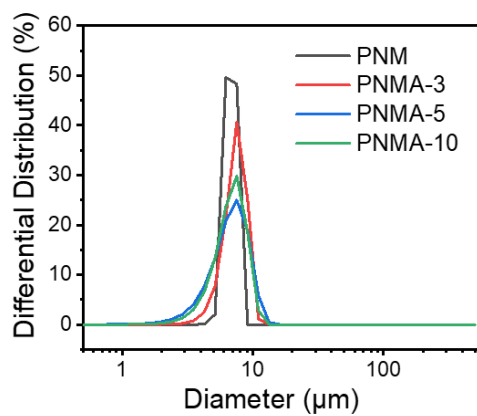

**Fig. S2** Particle size distribution curves of PNM, PNMA-3, PNMA-5 and PNMA-10.

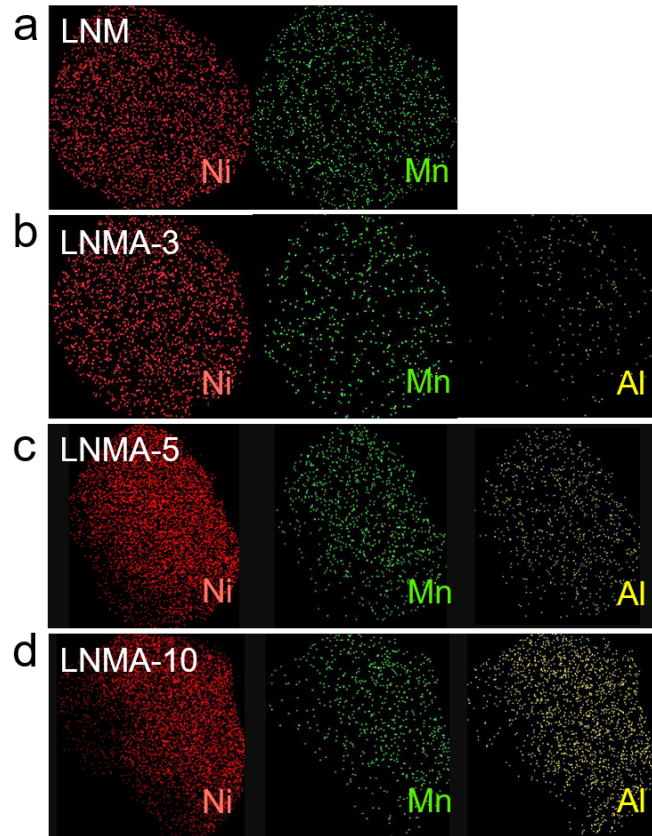

**Fig.S3** EDS Mapping of (a) LNM, (b) LNMA-3, (c) LNMA-5 and (d) LNMA-10.

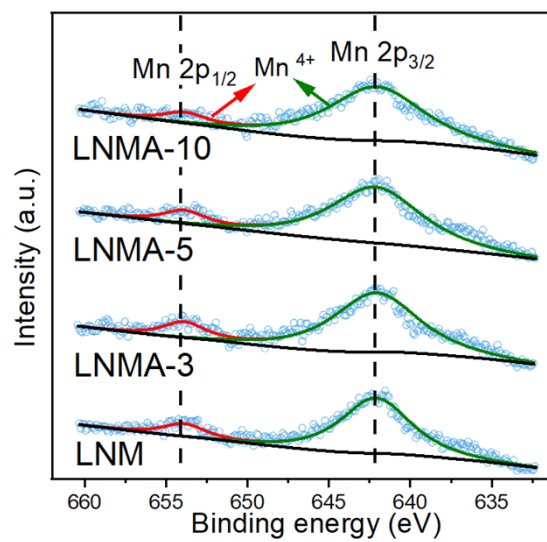

**Fig. S4** XPS spectra of manganese.

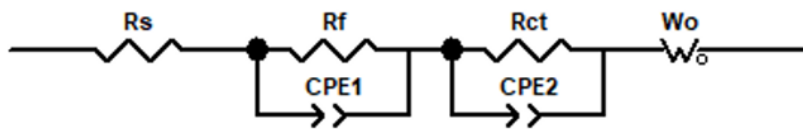

**Fig. S5** The equivalent circuit used to simulate the EIS data.

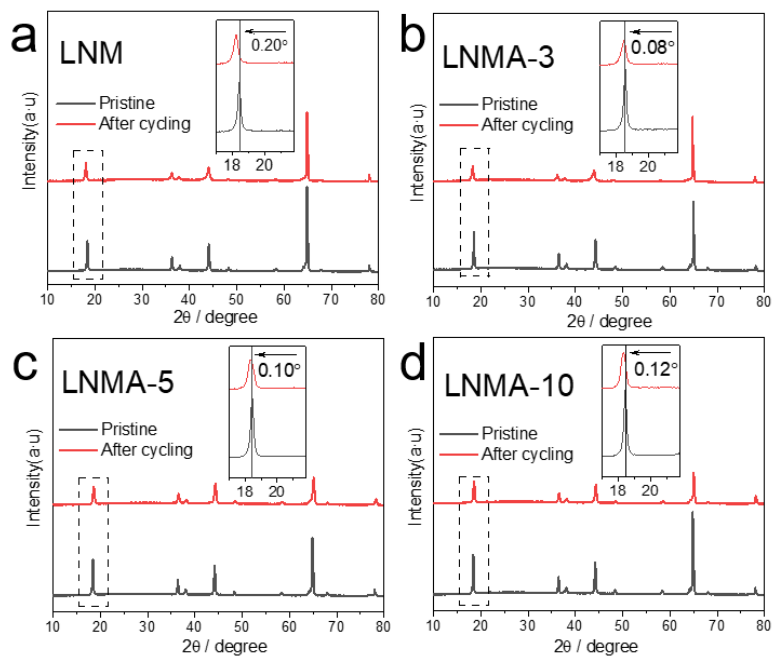

**Fig. S6** XRD patterns comparison of four electrodes before and after 300 cycles.

**Table S1** ICP chemical elemental compositions of LNM, LNMA-3, LNMA-5 and LNMA-10 materials.

| Sample  | Ni    | Mn    | Al    |
|---------|-------|-------|-------|
| LNM     | 0.799 | 0.202 | -     |
| LNMA-3  | 0.798 | 0.173 | 0.029 |
| LNMA-5  | 0.798 | 0.147 | 0.052 |
| LNMA-10 | 0.799 | 0.100 | 0.099 |

**Table S2** The refined lattice parameters of LNM, LNMA-3, LNMA-5 and LNMA-10 samples.

| Samples | a=b (Å) | c (Å)   | c/a    | Li <sup>+</sup> /Ni <sup>2+</sup><br>(%) | (003)/(104)<br>Observed | (003)/(104)<br>Fitted |
|---------|---------|---------|--------|------------------------------------------|-------------------------|-----------------------|
| LNM     | 2.8787  | 14.2341 | 4.9446 | 7.19                                     | 1.072                   | 1.002                 |
| LNMA-3  | 2.8752  | 14.2368 | 4.9516 | 6.08                                     | 1.169                   | 1.184                 |
| LNMA-5  | 2.8737  | 14.2390 | 4.9549 | 5.84                                     | 1.180                   | 1.233                 |
| LNMA-10 | 2.8695  | 14.2419 | 4.9632 | 5.32                                     | 1.276                   | 1.354                 |

**Table S3** Refined lattice parameters of LNM.

| Name             | Fractional coordinates |   |        | Occupancy | Uiso    |
|------------------|------------------------|---|--------|-----------|---------|
|                  | x                      | y | z      |           |         |
| Li               | 0                      | 0 | 0      | 0.9281    | 0.03970 |
| Li (in Ni layer) | 0                      | 0 | 0.5    | 0.0719    | 0.03274 |
| Ni               | 0                      | 0 | 0.5    | 0.7281    | 0.01018 |
| Ni (in Li layer) | 0                      | 0 | 0      | 0.0719    | 0.03403 |
| Mn               | 0                      | 0 | 0.5    | 0.2000    | 0.03911 |
| O                | 0                      | 0 | 0.2440 | 1.0000    | 0.03316 |

**Table S4** Refined lattice parameters of LNMA-3.

| Name             | Fractional coordinates |   |        | Occupancy | Uiso    |
|------------------|------------------------|---|--------|-----------|---------|
|                  | x                      | y | z      |           |         |
| Li               | 0                      | 0 | 0      | 0.9392    | 0.05211 |
| Li (in Ni layer) | 0                      | 0 | 0.5    | 0.0608    | 0.04734 |
| Ni               | 0                      | 0 | 0.5    | 0.7392    | 0.01690 |
| Ni (in Li layer) | 0                      | 0 | 0      | 0.0608    | 0.04734 |
| Mn               | 0                      | 0 | 0.5    | 0.1700    | 0.02804 |
| Al               | 0                      | 0 | 0.5    | 0.0300    | 0.03490 |
| O                | 0                      | 0 | 0.2441 | 1.0000    | 0.03645 |

**Table S5** Refined lattice parameters of LNMA-5.

| Name             | Fractional coordinates |   |        | Occupancy | Uiso    |
|------------------|------------------------|---|--------|-----------|---------|
|                  | x                      | y | z      |           |         |
| Li               | 0                      | 0 | 0      | 0.9416    | 0.04363 |
| Li (in Ni layer) | 0                      | 0 | 0.5    | 0.0584    | 0.03734 |
| Ni               | 0                      | 0 | 0.5    | 0.7416    | 0.01211 |
| Ni (in Li layer) | 0                      | 0 | 0      | 0.0584    | 0.02450 |
| Mn               | 0                      | 0 | 0.5    | 0.1500    | 0.02453 |
| Al               | 0                      | 0 | 0.5    | 0.0500    | 0.03096 |
| O                | 0                      | 0 | 0.2438 | 1.0000    | 0.03221 |

**Table S6** Refined lattice parameters of LNMA-10.

| Name             | Fractional coordinates |   |        | Occupancy | Uiso    |
|------------------|------------------------|---|--------|-----------|---------|
|                  | x                      | y | z      |           |         |
| Li               | 0                      | 0 | 0      | 0.9468    | 0.04788 |
| Li (in Ni layer) | 0                      | 0 | 0.5    | 0.0532    | 0.03479 |
| Ni               | 0                      | 0 | 0.5    | 0.7468    | 0.00753 |
| Ni (in Li layer) | 0                      | 0 | 0      | 0.0532    | 0.04479 |
| Mn               | 0                      | 0 | 0.5    | 0.1000    | 0.03264 |
| Al               | 0                      | 0 | 0.5    | 0.1000    | 0.04264 |
| O                | 0                      | 0 | 0.2438 | 1.0000    | 0.02803 |

**Table S7** Refined lattice parameters of LNM, LNMA-3, LNMA-5 and LNMA-10.

| Average bond length | LNM      | LNMA-3   | LNMA-5   | LNMA-10  |
|---------------------|----------|----------|----------|----------|
| Li-O                | 2.0851 Å | 2.0921 Å | 2.0958 Å | 2.0964 Å |
| (Ni/Co/Mn/Al)-O     | 1.9914 Å | 1.9939 Å | 1.9858 Å | 1.9869 Å |

**Table S8** Half-cell performance of Ni-rich Co-free layered oxides cathodes.

| Cathode material                                                                                                                       | Capacity<br>(mAh g <sup>-1</sup> at<br>0.1 C) | Cycling<br>performance<br>(capacity retention<br>at<br>100 cycles) | Cycling<br>voltage<br>(V) | Ref.         |
|----------------------------------------------------------------------------------------------------------------------------------------|-----------------------------------------------|--------------------------------------------------------------------|---------------------------|--------------|
| LiNi <sub>0.8</sub> Mn <sub>0.2</sub> O <sub>2</sub>                                                                                   | 4.3 V, 201.7                                  | 88.3%                                                              | 4.3 V                     | [1]          |
| LiNi <sub>0.85</sub> Fe <sub>0.052</sub> Al <sub>0.091</sub> O <sub>2</sub>                                                            | 4.3V, 160.0                                   | 88.0%                                                              | 4.3 V                     | [2]          |
| LiNi <sub>0.8</sub> Mn <sub>0.2</sub> O <sub>2</sub>                                                                                   | 4.5 V, 210.0                                  | 86.2%                                                              | 4.5 V                     | [3]          |
| LiNi <sub>0.9</sub> Mn <sub>0.05</sub> Al <sub>0.05</sub> O <sub>2</sub>                                                               | 4.6 V, 223.7                                  | 79.6%                                                              | 4.6 V                     | [4]          |
| LiNi <sub>0.8</sub> Mn <sub>0.13</sub> Ti <sub>0.02</sub> -<br>Mg <sub>0.02</sub> Nb <sub>0.01</sub> Mo <sub>0.02</sub> O <sub>2</sub> | 4.5 V, 210.1                                  | 98.9%                                                              | 4.3 V                     | [5]          |
| LiNi <sub>0.9</sub> Mn <sub>0.1</sub> O <sub>2</sub>                                                                                   | 4.4 V, 232.4                                  | 91.5%                                                              | 4.4 V                     | [6]          |
| LiNi <sub>0.8</sub> Mn <sub>0.15</sub> Al <sub>0.05</sub> O <sub>2</sub>                                                               | 4.3 V, 183.1                                  | 96.2%                                                              | 4.3 V                     | This<br>work |



**Table S9** Electrochemical impedance spectrum values of the LNM, LNMA-3, LNMA-5 and LNMA-10 cathodes after one cycle and 30 cycles.

|         | 1st                |                    |                       | 30th               |                    |                       |
|---------|--------------------|--------------------|-----------------------|--------------------|--------------------|-----------------------|
|         | $R_s$ ( $\Omega$ ) | $R_f$ ( $\Omega$ ) | $R_{ct}$ ( $\Omega$ ) | $R_s$ ( $\Omega$ ) | $R_f$ ( $\Omega$ ) | $R_{ct}$ ( $\Omega$ ) |
| LNM     | 2.082              | 4.100              | 10.630                | 4.526              | 6.947              | 21.760                |
| LNMA-3  | 1.964              | 4.651              | 6.876                 | 3.174              | 8.877              | 15.464                |
| LNMA-5  | 1.686              | 3.680              | 6.068                 | 4.467              | 5.086              | 11.553                |
| LNMA-10 | 1.637              | 4.421              | 9.266                 | 4.712              | 4.888              | 14.122                |

## References:

1. Y. K. Sun, D. J. Lee, Y. J. Lee, Z. H. Chen, S. T. Myung, *ACS Appl. Mater. Interfaces*, 2013, 5, 11434-11440.
2. N. Muralidharan, R. Essehli, R. P. Hermann, A. Parejiya, R. Amin, Y. C. Bai, Z. J. Du, I. Belharouak, *J. Power Sources*, 2020, 471, 228389.
3. T. C. Liu, L. Y. J. J. Liu, J. Lu, X. X. Bi, A. Dai, M. Li, M. F. Li, Z. X. Hu, L. Ma, D. Luo, J. X. Zheng, T. P. Wu, Y. Ren, J. G. Wen, F. Pan, K. Amine, *Nat. Energy*, 2021, 6, 277-286.
4. R. Brow, A. Donakowski, A. Mesnier, D. J. Pereira, K. X. Steirer, S. Santhanagopalan, A. Manthiram, Steirer, *ACS Appl. Energy Mater.*, 2022, 5, 6996-7005.
5. R. Zhang, C. Y. Wang, P. C. Zou, R. Q. Lin, L. Ma, L. Yin, T. Y. Li, W. Q. Xu, H. Jia, Q. Y. Li, S. Sainio, K. Kisslinger, S. E. Trask, S. N. Ehrlich, Y. Yang, A. M. Kiss, M. Y. Ge, B. J. Polzin, S. J. Lee, W. Xu, Y. Ren, H. L. Xin, *Nature*, 2022, 610, 67-73.
6. G. T. Park, H. H. Sun, T. C. Noh, F. Maglia, S. J. Kim, P. Lamp, Y. K. Sun, *Adv. Energy Mater.*, 2022, 12, 2202719.
